# Supplementary material
Source: MDPI journal article supplement (https://www.mdpi.com/2073-4441/13/15/2122)
Supplement: s1 [file s1]

**Figure S1.** Weekly monitoring data ( $n=118$  per site) from the two years prior to sampling indicate consistently higher abundance of *E. coli* at the CSO site. Data are presented as means ( $\pm$  S.E.) for each season with 10–12 sampling events per point.

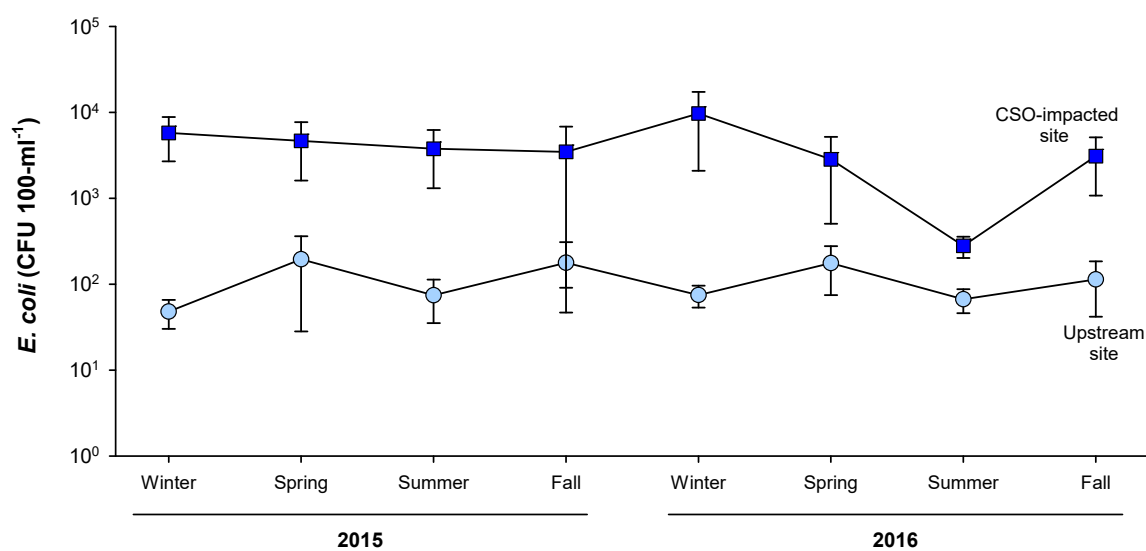

**Figure S2.** Resistance profiles showing associations among antibiotics. Results for all 10 antibiotics and all 134 isolates were coded into a binary matrix (0 for susceptible and 1 for resistant) and then subjected to cluster analysis using the Jaccard similarity coefficient and the unweighted pair group method with arithmetic mean (UPGMA) method. Bootstrapping was performed (N=1000), and the percentage of replicates where each node was supported is given on the dendrogram.

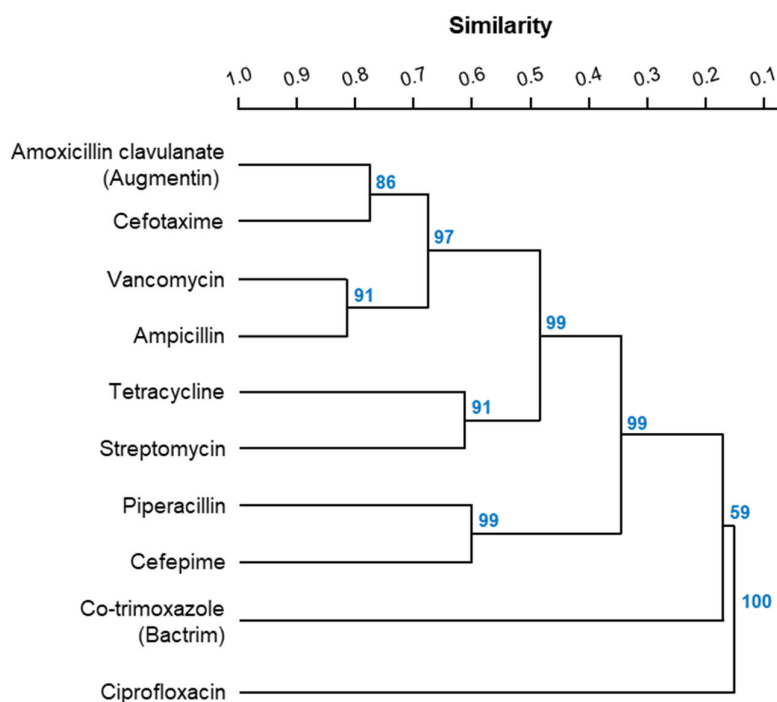

**Table S1.** Number of isolates in each taxonomic group. For any group containing 10 or more (i.e.,  $\geq 7.5\%$  of the sampling effort), Fisher's exact test was applied to test for equal distribution across sample types. Results are presented as  $p$  values with \* highlighting values  $< 0.05$  and \*\* for values  $\leq 0.001$ .

| Group                         | Total No.<br>Isolates | Upstream<br>Clear Weather | CSO site<br>Clear Weather | CSO site<br>Overflow Event | $p$         |
|-------------------------------|-----------------------|---------------------------|---------------------------|----------------------------|-------------|
| Family Comamonadaceae         | 29                    | 8                         | 11                        | 10                         | 0.71        |
| Genus <i>Pseudomonas</i>      | 22                    | 5                         | 7                         | 10                         | 0.42        |
| Genus <i>Stenotrophomonas</i> | 19                    | 0                         | 2                         | 17                         | $<0.001$ ** |
| Genus <i>Chryseobacterium</i> | 13                    | 0                         | 9                         | 4                          | 0.001 **    |
| Family Sphingomonadaceae      | 12                    | 8                         | 2                         | 2                          | 0.04 *      |
| Genus <i>Caulobacter</i>      | 10                    | 8                         | 0                         | 2                          | 0.004 **    |
| Family Enterobacteriaceae     | 8                     | 6                         | 2                         | 0                          |             |
| Genus <i>Chromobacterium</i>  | 6                     | 2                         | 4                         | 0                          |             |
| Bacilli                       | 4                     | 1                         | 3                         | 0                          |             |
| Genus <i>Aeromonas</i>        | 2                     | 1                         | 1                         | 0                          |             |
| Genus <i>Acinetobacter</i>    | 1                     | 0                         | 1                         | 0                          |             |
| Genus <i>Bordetella</i>       | 1                     | 1                         | 0                         | 0                          |             |
| Genus <i>Sphingobacterium</i> | 1                     | 1                         | 0                         | 0                          |             |

**Table S2.** Taxonomic classifications and resistance profiles for all isolates. Also listed is the GenBank accession number, the length (bp) of the 16S rRNA gene sequenced, the % identity match, and whether the organism was considered to be potentially pathogenic. Antibiotic resistance profiles (1 = resistant, 0 = susceptible) are provide for ten drugs: ampicillin (AMP), piperacillin (PRL), cefepime (FEP), ciprofloxacin (CIP), cefotaxime (CTX), tetracycline (TE), co-trimoxazole (SXT), amoxicillin clavulanate (AMC), streptomycin (S), and vancomycin (VA).

| Site_Condition_Isolate#   | Accession | bp   | %     | Family             | Genus                  | Species / Strain                 | Pathogen? | AMP | PRL | FEP | CIP | CTX | TE | SXT | S | VA | AMC |
|---------------------------|-----------|------|-------|--------------------|------------------------|----------------------------------|-----------|-----|-----|-----|-----|-----|----|-----|---|----|-----|
| Upstream_Clear_Weather_1  | MZ490702  | 1411 | 99.9  | Aeromonadaceae     | <i>Aeromonas</i>       | <i>A. hydrophila</i>             | Yes       | 1   | 0   | 0   | 0   | 0   | 0  | 0   | 0 | 0  | 0   |
| Upstream_Clear_Weather_2  | MZ490703  | 1401 | 98.6  | Alcaligenaceae     | <i>Bordetella</i>      | <i>Bordetella</i> sp.            | Yes       | 1   | 1   | 0   | 0   | 1   | 0  | 1   | 0 | 0  | 1   |
| Upstream_Clear_Weather_3  | MZ490704  | 1352 | 99.7  | Caulobacteraceae   | <i>Caulobacter</i>     | <i>C. flavus</i>                 | No        | 1   | 0   | 0   | 0   | 0   | 0  | 0   | 0 | 1  | 0   |
| Upstream_Clear_Weather_4  | MZ490705  | 1357 | 99.7  | Caulobacteraceae   | <i>Caulobacter</i>     | <i>C. flavus</i>                 | No        | 1   | 0   | 0   | 0   | 1   | 0  | 1   | 0 | 1  | 1   |
| Upstream_Clear_Weather_5  | MZ490706  | 1354 | 99.8  | Caulobacteraceae   | <i>Caulobacter</i>     | <i>C. flavus</i>                 | No        | 1   | 0   | 0   | 0   | 1   | 1  | 0   | 1 | 1  | 1   |
| Upstream_Clear_Weather_6  | MZ490707  | 1354 | 99.1  | Caulobacteraceae   | <i>Caulobacter</i>     | <i>C. vibrioides</i>             | No        | 1   | 0   | 0   | 0   | 1   | 1  | 0   | 1 | 1  | 1   |
| Upstream_Clear_Weather_7  | MZ490708  | 1354 | 99.5  | Caulobacteraceae   | <i>Caulobacter</i>     | <i>C. segnis</i>                 | No        | 1   | 0   | 0   | 1   | 0   | 0  | 1   | 0 | 1  | 0   |
| Upstream_Clear_Weather_8  | MZ490709  | 1353 | 99.4  | Caulobacteraceae   | <i>Caulobacter</i>     | <i>C. segnis</i>                 | No        | 1   | 0   | 0   | 0   | 1   | 0  | 1   | 1 | 1  | 1   |
| Upstream_Clear_Weather_9  | MZ490710  | 1355 | 99.8  | Caulobacteraceae   | <i>Caulobacter</i>     | <i>C. vibrioides</i>             | No        | 1   | 0   | 0   | 0   | 1   | 1  | 0   | 1 | 1  | 1   |
| Upstream_Clear_Weather_10 | MZ490711  | 1356 | 99.9  | Caulobacteraceae   | <i>Caulobacter</i>     | <i>C. vibrioides</i>             | No        | 1   | 0   | 0   | 0   | 0   | 0  | 0   | 1 | 1  | 0   |
| Upstream_Clear_Weather_11 | MZ490712  | 1168 | 99.1  | Colwelliaceae      | <i>Colwellia</i>       | <i>Colwellia</i> sp.             | No        | 1   | 0   | 0   | 0   | 0   | 1  | 0   | 1 | 1  | 1   |
| Upstream_Clear_Weather_12 | MZ490713  | 1399 | 99.2  | Comamonadaceae     | <i>Acidovorax</i>      | sp. R-24667                      | No        | 1   | 0   | 0   | 0   | 1   | 1  | 0   | 1 | 1  | 1   |
| Upstream_Clear_Weather_13 | MZ490714  | 1401 | 99.2  | Comamonadaceae     | <i>Acidovorax</i>      | <i>A. wautersii</i>              | No        | 1   | 0   | 0   | 0   | 1   | 0  | 0   | 0 | 1  | 1   |
| Upstream_Clear_Weather_14 | MZ490715  | 1396 | 99.5  | Comamonadaceae     | <i>Acidovorax</i>      | <i>A. delafieldii</i>            | No        | 1   | 0   | 0   | 0   | 1   | 0  | 1   | 0 | 1  | 1   |
| Upstream_Clear_Weather_15 | MZ490716  | 1401 | 99.8  | Comamonadaceae     | <i>Delftia</i>         | <i>D. acidovorans</i>            | Yes       | 1   | 0   | 0   | 1   | 0   | 0  | 0   | 1 | 1  | 0   |
| Upstream_Clear_Weather_16 | MZ490717  | 1398 | 99.6  | Comamonadaceae     | <i>Mitsuaria</i>       | <i>M. chitosanitabida</i> 102408 | No        | 1   | 0   | 0   | 0   | 0   | 1  | 0   | 0 | 1  | 1   |
| Upstream_Clear_Weather_17 | MZ490718  | 1403 | 99.7  | Comamonadaceae     | <i>Pseudacidovorax</i> | <i>P. intermedius</i> CC-21      | No        | 1   | 0   | 1   | 0   | 0   | 0  | 0   | 1 | 0  | 0   |
| Upstream_Clear_Weather_18 | MZ490719  | 1399 | 99.8  | Comamonadaceae     | <i>Pseudacidovorax</i> | <i>P. intermedius</i> CC-21      | No        | 1   | 1   | 0   | 0   | 0   | 0  | 0   | 0 | 1  | 0   |
| Upstream_Clear_Weather_19 | MZ490720  | 1412 | 99.5  | Enterobacteriaceae | <i>Klebsiella</i>      | sp. HE1                          | No        | 1   | 0   | 0   | 0   | 0   | 1  | 0   | 0 | 1  | 1   |
| Upstream_Clear_Weather_20 | MZ490721  | 1389 | 99.5  | Enterobacteriaceae | <i>Serratia</i>        | <i>Serratia</i> sp.              | No        | 1   | 0   | 0   | 0   | 1   | 0  | 0   | 1 | 1  | 1   |
| Upstream_Clear_Weather_21 | MZ490722  | 1409 | 98.8  | Enterobacteriaceae | <i>Serratia</i>        | <i>Serratia</i> sp.              | No        | 1   | 0   | 0   | 0   | 0   | 1  | 0   | 1 | 1  | 1   |
| Upstream_Clear_Weather_22 | MZ490723  | 1080 | 99.4  | Enterobacteriaceae | <i>Serratia</i>        | <i>Serratia</i> sp.              | No        | 1   | 0   | 0   | 0   | 1   | 0  | 0   | 0 | 1  | 1   |
| Upstream_Clear_Weather_23 | MZ490724  | 1409 | 99.7  | Enterobacteriaceae | <i>Serratia</i>        | <i>Serratia</i> sp.              | No        | 1   | 0   | 0   | 1   | 1   | 1  | 1   | 1 | 1  | 1   |
| Upstream_Clear_Weather_24 | MZ490725  | 722  | 100.0 | Enterobacteriaceae | <i>Serratia</i>        | <i>Serratia</i> sp.              | No        | 1   | 0   | 0   | 0   | 0   | 1  | 0   | 1 | 1  | 1   |
| Upstream_Clear_Weather_25 | MZ490726  | 1360 | 99.8  | Erythrobacteraceae | <i>Porphyrobacter</i>  | <i>P. colymbi</i>                | No        | 1   | 0   | 1   | 0   | 1   | 1  | 0   | 1 | 1  | 0   |

|                           |          |      |       |                        |                          |                                   |     |   |   |   |   |   |   |   |   |   |   |
|---------------------------|----------|------|-------|------------------------|--------------------------|-----------------------------------|-----|---|---|---|---|---|---|---|---|---|---|
| Upstream_Clear_Weather_26 | MZ490727 | 1403 | 99.3  | Neisseriaceae          | <i>Chromobacterium</i>   | <i>C. aquaticum</i>               | No  | 1 | 1 | 0 | 0 | 0 | 0 | 0 | 0 | 0 | 1 |
| Upstream_Clear_Weather_27 | MZ490728 | 1405 | 99.7  | Neisseriaceae          | <i>Chromobacterium</i>   | <i>C. violaceum</i>               | Yes | 1 | 0 | 0 | 0 | 1 | 0 | 0 | 0 | 1 | 1 |
| Upstream_Clear_Weather_28 | MZ490729 | 1432 | 99.8  | Planococcaceae         | <i>Solibacillus</i>      | <i>S. silvestris</i>              | No  | 1 | 0 | 0 | 0 | 0 | 1 | 0 | 1 | 1 | 0 |
| Upstream_Clear_Weather_29 | MZ490730 | 1179 | 99.6  | Pseudoalteromonadaceae | <i>Pseudoalteromonas</i> | sp. 18III/A01/059                 | No  | 1 | 0 | 0 | 0 | 1 | 0 | 0 | 1 | 1 | 1 |
| Upstream_Clear_Weather_30 | MZ490731 | 1403 | 99.8  | Pseudomonadaceae       | <i>Pseudomonas</i>       | <i>P. fluorescens</i> Pf0-1       | Yes | 1 | 0 | 0 | 0 | 1 | 0 | 0 | 0 | 1 | 1 |
| Upstream_Clear_Weather_31 | MZ490732 | 1407 | 99.7  | Pseudomonadaceae       | <i>Pseudomonas</i>       | <i>P. protegens</i>               | No  | 1 | 0 | 0 | 0 | 1 | 0 | 1 | 0 | 1 | 1 |
| Upstream_Clear_Weather_32 | MZ490733 | 1402 | 99.3  | Pseudomonadaceae       | <i>Pseudomonas</i>       | <i>P. mandelii</i>                | No  | 1 | 0 | 0 | 0 | 1 | 0 | 0 | 0 | 1 | 1 |
| Upstream_Clear_Weather_33 | MZ490734 | 1186 | 99.8  | Rhodobacteraceae       | <i>Sulfitobacter</i>     | <i>Sulfitobacter</i> sp.          | No  | 1 | 1 | 1 | 0 | 1 | 1 | 0 | 1 | 1 | 0 |
| Upstream_Clear_Weather_34 | MZ490735 | 1397 | 99.4  | Sphingobacteriaceae    | <i>Sphingobacterium</i>  | <i>S. multivorum</i>              | Yes | 1 | 0 | 1 | 0 | 0 | 0 | 0 | 1 | 1 | 0 |
| Upstream_Clear_Weather_35 | MZ490736 | 1360 | 98.9  | Sphingomonadaceae      | <i>Novosphingobium</i>   | <i>Novosphingobium</i> sp.        | No  | 1 | 1 | 0 | 0 | 0 | 0 | 0 | 1 | 1 | 0 |
| Upstream_Clear_Weather_36 | MZ490737 | 1358 | 99.3  | Sphingomonadaceae      | <i>Novosphingobium</i>   | <i>Novosphingobium</i> sp.        | No  | 1 | 0 | 0 | 0 | 0 | 1 | 0 | 1 | 0 | 0 |
| Upstream_Clear_Weather_37 | MZ490738 | 1356 | 99.9  | Sphingomonadaceae      | <i>Sphingomonas</i>      | <i>S. melonis</i>                 | No  | 1 | 1 | 0 | 0 | 0 | 0 | 0 | 1 | 1 | 0 |
| Upstream_Clear_Weather_38 | MZ490739 | 1357 | 99.9  | Sphingomonadaceae      | <i>Sphingomonas</i>      | <i>S. melonis</i>                 | No  | 1 | 1 | 0 | 1 | 0 | 1 | 0 | 1 | 0 | 0 |
| Upstream_Clear_Weather_39 | MZ490740 | 1359 | 98.8  | Sphingomonadaceae      | <i>Sphingomonas</i>      | <i>S. melonis</i>                 | No  | 1 | 0 | 0 | 0 | 0 | 1 | 0 | 1 | 1 | 0 |
| Upstream_Clear_Weather_40 | MZ490741 | 1360 | 99.1  | Sphingomonadaceae      | <i>Sphingomonas</i>      | <i>S. panni</i> C52               | No  | 1 | 0 | 0 | 0 | 0 | 1 | 0 | 1 | 0 | 0 |
| Upstream_Clear_Weather_41 | MZ490742 | 1358 | 99.4  | Sphingomonadaceae      | <i>Sphingomonas</i>      | <i>S. phyllosphaerae</i> FA1      | No  | 1 | 1 | 0 | 0 | 0 | 0 | 0 | 1 | 1 | 0 |
| Upstream_Clear_Weather_42 | MZ490743 | 1356 | 99.5  | Sphingomonadaceae      | <i>Sphingomonas</i>      | <i>S. phyllosphaerae</i> FA1      | No  | 1 | 0 | 0 | 0 | 0 | 0 | 0 | 1 | 1 | 0 |
| Upstream_Clear_Weather_43 | MZ490744 | 1401 | 100.0 | Pseudomonadaceae       | <i>Pseudomonas</i>       | <i>Pseudomonas</i> sp.            | No  | 1 | 0 | 0 | 0 | 1 | 0 | 1 | 0 | 1 | 1 |
| Upstream_Clear_Weather_44 | MZ490745 | 1406 | 100.0 | Pseudomonadaceae       | <i>Pseudomonas</i>       | <i>Pseudomonas</i> sp.            | No  | 1 | 0 | 0 | 0 | 1 | 0 | 0 | 1 | 1 | 1 |
| Upstream_Clear_Weather_44 | MZ490746 | 1394 | 98.3  | Comamonadaceae         | <i>Pseudacidovorax</i>   | <i>P. intermedius</i> CC-21       | No  | 1 | 1 | 1 | 0 | 1 | 0 | 0 | 1 | 0 | 1 |
| CSO_Clear_Weather_1       | MZ490658 | 1407 | 100.0 | Aeromonadaceae         | <i>Aeromonas</i>         | <i>A. hydrophila</i>              | Yes | 1 | 0 | 0 | 0 | 0 | 0 | 0 | 0 | 1 | 1 |
| CSO_Clear_Weather_2       | MZ490659 | 1424 | 99.9  | Bacillaceae            | <i>Bacillus</i>          | <i>B. cereus</i> F837/76          | Yes | 1 | 0 | 0 | 0 | 0 | 1 | 0 | 1 | 0 | 1 |
| CSO_Clear_Weather_3       | MZ490660 | 1421 | 99.9  | Bacillaceae            | <i>Bacillus</i>          | <i>B. cereus</i> F837/76          | Yes | 1 | 1 | 1 | 0 | 1 | 0 | 1 | 1 | 1 | 1 |
| CSO_Clear_Weather_4       | MZ490661 | 1399 | 99.7  | Comamonadaceae         | <i>Acidovorax</i>        | <i>A. avenae</i>                  | No  | 1 | 1 | 1 | 1 | 1 | 0 | 0 | 1 | 1 | 0 |
| CSO_Clear_Weather_5       | MZ490662 | 1404 | 99.7  | Comamonadaceae         | <i>Acidovorax</i>        | <i>A. avenae</i>                  | No  | 1 | 0 | 0 | 0 | 1 | 1 | 0 | 1 | 1 | 1 |
| CSO_Clear_Weather_6       | MZ490663 | 1396 | 99.8  | Comamonadaceae         | <i>Acidovorax</i>        | sp. R-24667                       | No  | 1 | 1 | 0 | 0 | 1 | 0 | 1 | 0 | 1 | 1 |
| CSO_Clear_Weather_7       | MZ490664 | 1398 | 99.0  | Comamonadaceae         | <i>Acidovorax</i>        | <i>A. temperans</i>               | Yes | 1 | 0 | 0 | 1 | 1 | 1 | 0 | 1 | 1 | 1 |
| CSO_Clear_Weather_8       | MZ490665 | 1397 | 99.6  | Comamonadaceae         | <i>Acidovorax</i>        | <i>A. temperans</i>               | Yes | 1 | 0 | 0 | 1 | 0 | 0 | 0 | 1 | 1 | 0 |
| CSO_Clear_Weather_9       | MZ490666 | 1401 | 99.9  | Comamonadaceae         | <i>Comamonas</i>         | <i>C. testosteroni</i>            | Yes | 1 | 0 | 0 | 0 | 0 | 0 | 0 | 1 | 1 | 0 |
| CSO_Clear_Weather_10      | MZ490667 | 1401 | 98.5  | Comamonadaceae         | <i>Mitsuraria</i>        | <i>M. chitosanitabida</i> 102408  | No  | 1 | 0 | 0 | 0 | 0 | 0 | 0 | 1 | 1 | 1 |
| CSO_Clear_Weather_11      | MZ490668 | 1395 | 98.6  | Comamonadaceae         | <i>Mitsuraria</i>        | <i>M. chitosanitabida</i> 102408  | No  | 1 | 0 | 0 | 0 | 1 | 0 | 0 | 1 | 0 | 1 |
| CSO_Clear_Weather_12      | MZ490669 | 1400 | 98.7  | Comamonadaceae         | uncultured               | uncultured                        | No  | 1 | 0 | 0 | 0 | 0 | 1 | 0 | 0 | 1 | 1 |
| CSO_Clear_Weather_13      | MZ490670 | 1403 | 98.7  | Comamonadaceae         | <i>Variovorax</i>        | sp. TUT1027                       | No  | 1 | 0 | 0 | 0 | 1 | 0 | 1 | 0 | 1 | 1 |
| CSO_Clear_Weather_14      | MZ490671 | 1410 | 99.8  | Comamonadaceae         | <i>Variovorax</i>        | sp. TUT1027                       | No  | 1 | 0 | 0 | 0 | 1 | 0 | 1 | 0 | 1 | 1 |
| CSO_Clear_Weather_15      | MZ490672 | 995  | 99.8  | Enterobacteriaceae     | <i>Providencia</i>       | <i>P. alcalifaciens</i> DSM 30120 | Yes | 1 | 0 | 0 | 0 | 0 | 1 | 0 | 0 | 1 | 1 |
| CSO_Clear_Weather_16      | MZ490673 | 1001 | 99.6  | Enterobacteriaceae     | <i>Providencia</i>       | <i>P. alcalifaciens</i> DSM 30120 | Yes | 1 | 0 | 0 | 0 | 0 | 1 | 0 | 0 | 1 | 1 |
| CSO_Clear_Weather_17      | MZ490674 | 1049 | 98.8  | Flavobacteriaceae      | <i>Chryseobacterium</i>  | <i>C. gleum</i>                   | Yes | 1 | 1 | 1 | 1 | 1 | 1 | 1 | 1 | 1 | 1 |
| CSO_Clear_Weather_18      | MZ490675 | 1388 | 99.1  | Flavobacteriaceae      | <i>Chryseobacterium</i>  | <i>C. indologenes</i>             | Yes | 1 | 0 | 0 | 1 | 1 | 1 | 0 | 1 | 1 | 1 |

|                      |          |      |       |                   |                         |                             |     |   |   |   |   |   |   |   |   |   |   |
|----------------------|----------|------|-------|-------------------|-------------------------|-----------------------------|-----|---|---|---|---|---|---|---|---|---|---|
| CSO_Clear_Weather_19 | MZ490676 | 1387 | 99.1  | Flavobacteriaceae | <i>Chryseobacterium</i> | <i>C. indologenes</i>       | Yes | 1 | 1 | 0 | 1 | 1 | 1 | 0 | 1 | 0 | 1 |
| CSO_Clear_Weather_20 | MZ490677 | 1391 | 98.4  | Flavobacteriaceae | <i>Chryseobacterium</i> | <i>C. timonianum</i>        | Yes | 1 | 1 | 0 | 0 | 1 | 1 | 0 | 1 | 0 | 1 |
| CSO_Clear_Weather_21 | MZ490678 | 1391 | 98.4  | Flavobacteriaceae | <i>Chryseobacterium</i> | <i>C. timonianum</i>        | Yes | 1 | 1 | 0 | 0 | 1 | 1 | 0 | 1 | 1 | 1 |
| CSO_Clear_Weather_22 | MZ490679 | 1389 | 99.1  | Flavobacteriaceae | <i>Chryseobacterium</i> | <i>C. indologenes</i>       | Yes | 1 | 1 | 1 | 1 | 1 | 1 | 0 | 1 | 1 | 1 |
| CSO_Clear_Weather_23 | MZ490680 | 1392 | 99.1  | Flavobacteriaceae | <i>Chryseobacterium</i> | <i>C. vietnamense</i>       | No  | 1 | 0 | 1 | 1 | 1 | 1 | 0 | 1 | 1 | 1 |
| CSO_Clear_Weather_24 | MZ490681 | 1393 | 99.1  | Flavobacteriaceae | <i>Chryseobacterium</i> | <i>C. vietnamense</i>       | No  | 1 | 0 | 0 | 0 | 1 | 1 | 0 | 1 | 1 | 1 |
| CSO_Clear_Weather_25 | MZ490682 | 1393 | 99.2  | Flavobacteriaceae | <i>Chryseobacterium</i> | <i>C. vietnamense</i>       | No  | 1 | 1 | 1 | 1 | 1 | 1 | 0 | 1 | 1 | 1 |
| CSO_Clear_Weather_26 | MZ490683 | 1401 | 99.4  | Moraxellaceae     | <i>Acinetobacter</i>    | <i>A. baumannii</i> sp. LY1 | Yes | 1 | 0 | 0 | 0 | 1 | 1 | 0 | 0 | 1 | 0 |
| CSO_Clear_Weather_27 | MZ490684 | 1400 | 99.1  | Neisseriaceae     | <i>Chromobacterium</i>  | <i>C. rhizoryzae</i>        | No  | 1 | 1 | 0 | 0 | 0 | 0 | 0 | 0 | 1 | 1 |
| CSO_Clear_Weather_28 | MZ490685 | 1405 | 99.4  | Neisseriaceae     | <i>Chromobacterium</i>  | <i>C. aquaticum</i>         | No  | 1 | 1 | 0 | 0 | 1 | 0 | 0 | 0 | 1 | 1 |
| CSO_Clear_Weather_29 | MZ490686 | 1404 | 99.1  | Neisseriaceae     | <i>Chromobacterium</i>  | <i>C. rhizoryzae</i>        | No  | 1 | 0 | 0 | 0 | 0 | 1 | 0 | 1 | 1 | 0 |
| CSO_Clear_Weather_30 | MZ490687 | 1402 | 99.2  | Neisseriaceae     | <i>Chromobacterium</i>  | <i>C. rhizoryzae</i>        | No  | 1 | 0 | 0 | 0 | 0 | 1 | 0 | 1 | 0 | 1 |
| CSO_Clear_Weather_31 | MZ490688 | 1402 | 99.7  | Oxalobacteraceae  | <i>Herbaspirillum</i>   | <i>H. frisingense</i> GSF30 | No  | 1 | 0 | 0 | 0 | 0 | 0 | 0 | 0 | 1 | 1 |
| CSO_Clear_Weather_32 | MZ490689 | 1402 | 99.8  | Oxalobacteraceae  | <i>Herbaspirillum</i>   | <i>H. frisingense</i> GSF30 | No  | 1 | 0 | 0 | 0 | 1 | 0 | 1 | 0 | 1 | 1 |
| CSO_Clear_Weather_33 | MZ490690 | 1424 | 99.0  | Paenibacillaceae  | <i>Paenibacillus</i>    | <i>Paenibacillus</i> sp.    | No  | 1 | 0 | 1 | 0 | 1 | 0 | 0 | 1 | 0 | 0 |
| CSO_Clear_Weather_34 | MZ490691 | 1404 | 99.9  | Pseudomonadaceae  | <i>Pseudomonas</i>      | <i>P. putida</i>            | Yes | 1 | 1 | 1 | 0 | 1 | 0 | 1 | 1 | 1 | 1 |
| CSO_Clear_Weather_35 | MZ490692 | 1401 | 99.6  | Pseudomonadaceae  | <i>Pseudomonas</i>      | <i>P. putida</i> PC16       | Yes | 1 | 1 | 1 | 1 | 1 | 1 | 1 | 1 | 0 | 1 |
| CSO_Clear_Weather_36 | MZ490693 | 1404 | 99.9  | Pseudomonadaceae  | <i>Pseudomonas</i>      | <i>P. putida</i> KL47       | Yes | 1 | 0 | 0 | 0 | 1 | 1 | 1 | 1 | 1 | 1 |
| CSO_Clear_Weather_37 | MZ490694 | 1403 | 99.6  | Pseudomonadaceae  | <i>Pseudomonas</i>      | <i>P. putida</i> PC16       | Yes | 1 | 0 | 0 | 0 | 1 | 1 | 1 | 1 | 1 | 1 |
| CSO_Clear_Weather_38 | MZ490695 | 1406 | 99.3  | Pseudomonadaceae  | <i>Pseudomonas</i>      | <i>P. baetica</i>           | No  | 1 | 0 | 0 | 0 | 1 | 1 | 0 | 1 | 1 | 1 |
| CSO_Clear_Weather_39 | MZ490696 | 1406 | 99.4  | Pseudomonadaceae  | <i>Pseudomonas</i>      | <i>P. baetica</i>           | No  | 1 | 0 | 1 | 1 | 1 | 1 | 0 | 1 | 1 | 1 |
| CSO_Clear_Weather_40 | MZ490697 | 1362 | 98.5  | Sphingomonadaceae | <i>Sphingomonas</i>     | <i>S. melonis</i>           | No  | 1 | 1 | 0 | 0 | 0 | 0 | 0 | 1 | 0 | 0 |
| CSO_Clear_Weather_41 | MZ490698 | 1356 | 99.9  | Sphingomonadaceae | <i>Sphingomonas</i>     | <i>S. melonis</i>           | No  | 1 | 1 | 1 | 0 | 1 | 0 | 0 | 1 | 0 | 0 |
| CSO_Clear_Weather_42 | MZ490699 | 1418 | 100.0 | Xanthomonadaceae  | <i>Stenotrophomonas</i> | <i>Stenotrophomonas</i> sp. | No  | 1 | 1 | 1 | 0 | 1 | 1 | 0 | 1 | 1 | 1 |
| CSO_Clear_Weather_43 | MZ490700 | 1413 | 99.0  | Xanthomonadaceae  | <i>Stenotrophomonas</i> | <i>Stenotrophomonas</i> sp. | No  | 1 | 1 | 1 | 0 | 1 | 1 | 0 | 1 | 1 | 1 |
| CSO_Clear_Weather_44 | MZ490701 | 1403 | 99.6  | Pseudomonadaceae  | <i>Pseudomonas</i>      | sp. HMPB4                   | No  | 1 | 0 | 0 | 0 | 1 | 0 | 1 | 0 | 1 | 1 |
| CSO_Event_1          | MZ490613 | 1359 | 99.9  | Caulobacteraceae  | <i>Caulobacter</i>      | <i>C. segnis</i>            | No  | 1 | 1 | 1 | 0 | 1 | 0 | 1 | 0 | 1 | 1 |
| CSO_Event_2          | MZ490614 | 1358 | 99.9  | Caulobacteraceae  | <i>Caulobacter</i>      | sp. strain FWC35            | No  | 1 | 0 | 0 | 0 | 1 | 0 | 1 | 0 | 1 | 1 |
| CSO_Event_3          | MZ490615 | 1406 | 99.6  | Comamonadaceae    | <i>Acidovorax</i>       | <i>A. delafieldii</i>       | No  | 1 | 0 | 0 | 0 | 1 | 0 | 0 | 0 | 1 | 1 |
| CSO_Event_4          | MZ490616 | 1393 | 100.0 | Comamonadaceae    | <i>Acidovorax</i>       | <i>A. wautersii</i>         | No  | 1 | 1 | 1 | 0 | 1 | 0 | 0 | 0 | 1 | 0 |
| CSO_Event_5          | MZ490617 | 1403 | 99.1  | Comamonadaceae    | <i>Acidovorax</i>       | sp. J33                     | No  | 1 | 1 | 1 | 1 | 1 | 0 | 0 | 0 | 1 | 1 |
| CSO_Event_6          | MZ490618 | 1405 | 98.9  | Comamonadaceae    | <i>Delftia</i>          | <i>D. acidovorans</i>       | Yes | 1 | 0 | 0 | 0 | 1 | 0 | 1 | 1 | 1 | 1 |
| CSO_Event_7          | MZ490619 | 1408 | 99.8  | Comamonadaceae    | <i>Delftia</i>          | <i>D. acidovorans</i>       | Yes | 1 | 0 | 0 | 0 | 0 | 1 | 0 | 1 | 1 | 0 |
| CSO_Event_8          | MZ490620 | 1404 | 99.9  | Comamonadaceae    | <i>Delftia</i>          | <i>D. acidovorans</i>       | Yes | 1 | 0 | 0 | 0 | 0 | 1 | 0 | 1 | 1 | 0 |
| CSO_Event_9          | MZ490621 | 1402 | 99.8  | Comamonadaceae    | <i>Delftia</i>          | <i>D. acidovorans</i>       | Yes | 1 | 0 | 1 | 0 | 0 | 1 | 0 | 1 | 1 | 0 |
| CSO_Event_10         | MZ490622 | 1410 | 98.5  | Comamonadaceae    | <i>Variovorax</i>       | <i>V. boronicumulans</i>    | No  | 1 | 1 | 1 | 1 | 1 | 0 | 0 | 0 | 1 | 0 |
| CSO_Event_11         | MZ490623 | 1412 | 99.9  | Comamonadaceae    | <i>Variovorax</i>       | <i>V. boronicumulans</i>    | No  | 1 | 0 | 0 | 0 | 0 | 1 | 0 | 1 | 1 | 0 |
| CSO_Event_12         | MZ490624 | 742  | 100.0 | Comamonadaceae    | <i>Variovorax</i>       | <i>V. boronicumulans</i>    | No  | 1 | 0 | 1 | 0 | 1 | 1 | 0 | 1 | 1 | 1 |

|              |          |      |       |                   |                         |                             |     |   |   |   |   |   |   |   |   |   |   |
|--------------|----------|------|-------|-------------------|-------------------------|-----------------------------|-----|---|---|---|---|---|---|---|---|---|---|
| CSO_Event_13 | MZ490625 | 1386 | 99.6  | Flavobacteriaceae | <i>Chryseobacterium</i> | <i>C. lactis</i>            | No  | 1 | 1 | 1 | 0 | 1 | 1 | 0 | 1 | 1 | 0 |
| CSO_Event_14 | MZ490626 | 1386 | 99.6  | Flavobacteriaceae | <i>Chryseobacterium</i> | <i>C. lactis</i>            | No  | 1 | 1 | 1 | 0 | 1 | 1 | 0 | 1 | 1 | 1 |
| CSO_Event_15 | MZ490627 | 1385 | 99.4  | Flavobacteriaceae | <i>Chryseobacterium</i> | <i>Chryseobacterium</i> sp. | No  | 1 | 1 | 1 | 0 | 1 | 1 | 0 | 1 | 0 | 1 |
| CSO_Event_16 | MZ490628 | 1388 | 99.4  | Flavobacteriaceae | <i>Chryseobacterium</i> | <i>Chryseobacterium</i> sp. | No  | 1 | 1 | 1 | 0 | 1 | 1 | 0 | 1 | 0 | 1 |
| CSO_Event_17 | MZ490629 | 1403 | 100.0 | Pseudomonadaceae  | <i>Pseudomonas</i>      | <i>P. protegens</i>         | No  | 1 | 0 | 0 | 0 | 1 | 0 | 1 | 0 | 1 | 1 |
| CSO_Event_18 | MZ490630 | 1403 | 99.9  | Pseudomonadaceae  | <i>Pseudomonas</i>      | <i>P. fluorescens</i>       | Yes | 1 | 0 | 0 | 0 | 1 | 0 | 0 | 0 | 1 | 1 |
| CSO_Event_19 | MZ490631 | 1401 | 99.4  | Pseudomonadaceae  | <i>Pseudomonas</i>      | <i>P. putida</i>            | Yes | 1 | 0 | 0 | 0 | 1 | 0 | 0 | 1 | 1 | 1 |
| CSO_Event_20 | MZ490632 | 1405 | 100.0 | Pseudomonadaceae  | <i>Pseudomonas</i>      | <i>P. fluorescens</i>       | Yes | 1 | 0 | 0 | 0 | 1 | 0 | 0 | 0 | 1 | 1 |
| CSO_Event_21 | MZ490633 | 1078 | 99.5  | Pseudomonadaceae  | <i>Pseudomonas</i>      | sp. K94.08                  | No  | 1 | 0 | 1 | 0 | 1 | 0 | 1 | 0 | 1 | 1 |
| CSO_Event_22 | MZ490634 | 1408 | 99.7  | Pseudomonadaceae  | <i>Pseudomonas</i>      | sp. K94.08                  | No  | 1 | 0 | 1 | 0 | 1 | 0 | 1 | 0 | 1 | 1 |
| CSO_Event_23 | MZ490635 | 1402 | 99.4  | Pseudomonadaceae  | <i>Pseudomonas</i>      | <i>P. baetica</i>           | No  | 1 | 0 | 0 | 0 | 1 | 0 | 1 | 0 | 1 | 1 |
| CSO_Event_24 | MZ490636 | 1399 | 99.3  | Pseudomonadaceae  | <i>Pseudomonas</i>      | <i>P. fluorescens</i>       | Yes | 1 | 0 | 0 | 0 | 0 | 1 | 0 | 1 | 1 | 1 |
| CSO_Event_25 | MZ490637 | 1401 | 99.3  | Pseudomonadaceae  | <i>Pseudomonas</i>      | <i>P. fluorescens</i>       | Yes | 1 | 0 | 0 | 0 | 1 | 0 | 1 | 0 | 1 | 1 |
| CSO_Event_26 | MZ490638 | 1408 | 99.6  | Pseudomonadaceae  | <i>Pseudomonas</i>      | <i>Pseudomonas</i> sp.      | No  | 1 | 0 | 0 | 0 | 1 | 1 | 0 | 1 | 1 | 1 |
| CSO_Event_27 | MZ490639 | 1361 | 98.8  | Sphingomonadaceae | <i>Sphingopyxis</i>     | sp. DC2b-16                 | No  | 1 | 1 | 1 | 0 | 1 | 1 | 1 | 1 | 1 | 1 |
| CSO_Event_28 | MZ490640 | 1361 | 99.3  | Sphingomonadaceae | <i>Sphingopyxis</i>     | <i>S. witflariensis</i>     | No  | 1 | 0 | 0 | 0 | 1 | 1 | 0 | 1 | 1 | 1 |
| CSO_Event_29 | MZ490641 | 1412 | 99.1  | Xanthomonadaceae  | <i>Stenotrophomonas</i> | <i>Stenotrophomonas</i> sp. | No  | 1 | 1 | 1 | 0 | 1 | 1 | 0 | 1 | 0 | 1 |
| CSO_Event_30 | MZ490642 | 1413 | 99.7  | Xanthomonadaceae  | <i>Stenotrophomonas</i> | <i>Stenotrophomonas</i> sp. | No  | 1 | 1 | 1 | 0 | 1 | 0 | 0 | 1 | 1 | 1 |
| CSO_Event_31 | MZ490643 | 1419 | 99.9  | Xanthomonadaceae  | <i>Stenotrophomonas</i> | <i>Stenotrophomonas</i> sp. | No  | 1 | 1 | 1 | 0 | 1 | 0 | 0 | 1 | 1 | 1 |
| CSO_Event_32 | MZ490644 | 1416 | 99.9  | Xanthomonadaceae  | <i>Stenotrophomonas</i> | <i>Stenotrophomonas</i> sp. | No  | 1 | 1 | 1 | 0 | 1 | 0 | 0 | 1 | 0 | 1 |
| CSO_Event_33 | MZ490645 | 1091 | 99.7  | Xanthomonadaceae  | <i>Stenotrophomonas</i> | <i>S. maltophilia</i>       | Yes | 1 | 1 | 1 | 0 | 1 | 1 | 0 | 1 | 1 | 1 |
| CSO_Event_34 | MZ490646 | 1414 | 99.8  | Xanthomonadaceae  | <i>Stenotrophomonas</i> | <i>S. maltophilia</i>       | Yes | 1 | 1 | 1 | 0 | 1 | 1 | 0 | 1 | 1 | 1 |
| CSO_Event_35 | MZ490647 | 1410 | 99.9  | Xanthomonadaceae  | <i>Stenotrophomonas</i> | <i>S. maltophilia</i>       | Yes | 1 | 1 | 1 | 0 | 1 | 1 | 0 | 1 | 1 | 1 |
| CSO_Event_36 | MZ490648 | 1415 | 99.9  | Xanthomonadaceae  | <i>Stenotrophomonas</i> | <i>S. maltophilia</i>       | Yes | 1 | 1 | 1 | 0 | 1 | 1 | 0 | 1 | 1 | 1 |
| CSO_Event_37 | MZ490649 | 1417 | 99.5  | Xanthomonadaceae  | <i>Stenotrophomonas</i> | <i>S. maltophilia</i>       | Yes | 1 | 1 | 1 | 1 | 1 | 1 | 0 | 1 | 1 | 1 |
| CSO_Event_38 | MZ490650 | 1073 | 99.9  | Xanthomonadaceae  | <i>Stenotrophomonas</i> | <i>S. maltophilia</i>       | Yes | 1 | 1 | 1 | 0 | 1 | 1 | 0 | 1 | 0 | 1 |
| CSO_Event_39 | MZ490651 | 1083 | 99.9  | Xanthomonadaceae  | <i>Stenotrophomonas</i> | <i>S. maltophilia</i>       | Yes | 1 | 1 | 1 | 0 | 1 | 1 | 0 | 1 | 1 | 1 |
| CSO_Event_40 | MZ490652 | 1066 | 99.9  | Xanthomonadaceae  | <i>Stenotrophomonas</i> | <i>S. maltophilia</i>       | Yes | 1 | 1 | 1 | 0 | 1 | 1 | 0 | 1 | 1 | 1 |
| CSO_Event_41 | MZ490653 | 1415 | 99.9  | Xanthomonadaceae  | <i>Stenotrophomonas</i> | <i>S. maltophilia</i>       | Yes | 1 | 1 | 1 | 0 | 1 | 0 | 0 | 0 | 1 | 1 |
| CSO_Event_42 | MZ490654 | 1404 | 99.9  | Xanthomonadaceae  | <i>Stenotrophomonas</i> | <i>S. maltophilia</i>       | Yes | 1 | 1 | 1 | 1 | 1 | 0 | 0 | 1 | 0 | 1 |
| CSO_Event_43 | MZ490655 | 1415 | 100.0 | Xanthomonadaceae  | <i>Stenotrophomonas</i> | <i>S. maltophilia</i>       | Yes | 1 | 1 | 1 | 0 | 1 | 0 | 0 | 0 | 1 | 1 |
| CSO_Event_44 | MZ490656 | 1413 | 99.9  | Xanthomonadaceae  | <i>Stenotrophomonas</i> | <i>S. maltophilia</i>       | Yes | 1 | 0 | 0 | 1 | 1 | 0 | 0 | 0 | 0 | 1 |
| CSO_Event_45 | MZ490657 | 1419 | 99.9  | Xanthomonadaceae  | <i>Stenotrophomonas</i> | <i>S. maltophilia</i>       | Yes | 1 | 0 | 0 | 0 | 1 | 0 | 0 | 1 | 0 | 1 |
